# Supplementary material for: High molecular mass proteomics analyses of left ventricle from rats subjected to differential swimming training
Source: PubMed Central journal article supplement (PMC3508799; doi:10.1186/1472-6793-12-11), 2012-09-05

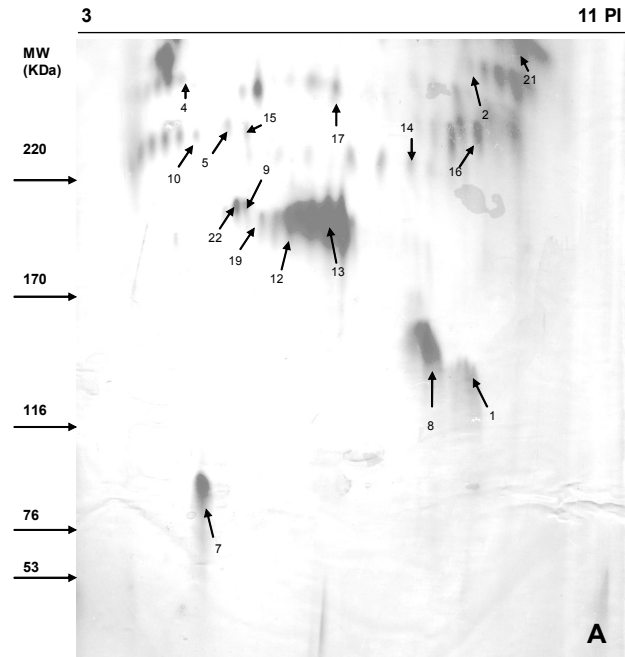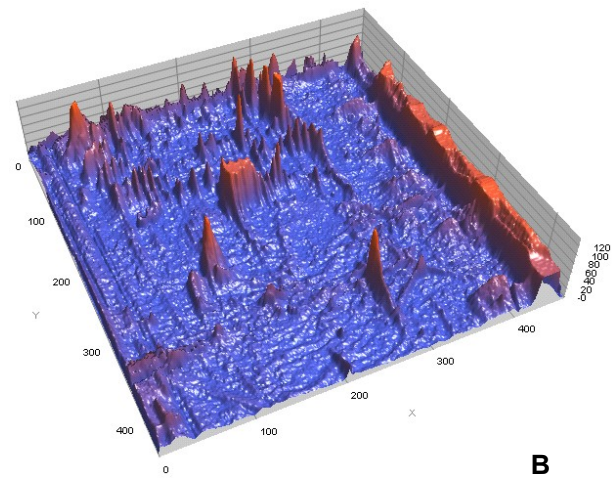

Supplement: 1472-6793-12-11-S3.pdf [file 1472-6793-12-11-S3.pdf]
